# Supplementary material for: Optical Window to Polarity of Electrolyte Solutions
Source: MDPI journal article supplement (doi:10.3390/molecules28114360), 2023-05-26
Supplement: s1 [file s1]

## Optical Window to Polarity of Electrolyte Solutions (Supplementary Materials)

Omar O'Mari and Valentine I. Vullev\*

### Materials

Anhydrous solvents ( $\text{CHCl}_3$ ,  $\text{CH}_2\text{Cl}_2$ ,  $(\text{CH}_2\text{Cl})_2$ ,  $\text{C}_6\text{H}_5\text{CN}$ , DMF, and  $\text{CH}_3\text{CN}$ ) and spectroscopic-grade solvents ( $\text{CHCl}_3$ ,  $\text{CH}_2\text{Cl}_2$ ,  $(\text{CH}_2\text{Cl})_2$ ,  $\text{C}_6\text{H}_5\text{CN}$ , DMF, and  $\text{CH}_3\text{CN}$ ) were purchased from Fisher Scientific. Two-step synthesis afforded *N*-Phenyl-4-dimethylamino-1,8-naphthalimide (ANI-Ph) as an orange-yellow crystalline solid (60% yield) as we have previously described (*J. Phys. Chem. A* **2009**, *113*, 1259-1267).  $^1\text{H}$  NMR (400 MHz,  $\text{DMSO}-d_6$ ),  $\delta/\text{ppm}$ : 8.57 (d, 1H), 8.47 (d, 1H), 8.35 (d, 1H), 7.80 (t, 1H), 7.50 (m, 3H), 7.34 (d, 2H), 7.26 (d, 1H), 3.13 (s, 6H) (Figure S1); HRMS: measured  $m/z$  for  $(\text{M}+\text{H})^+$  is 317.1293; calculated exact mass of  $\text{C}_{20}\text{H}_{17}\text{N}_2\text{O}_2^+$  is 317.1285.

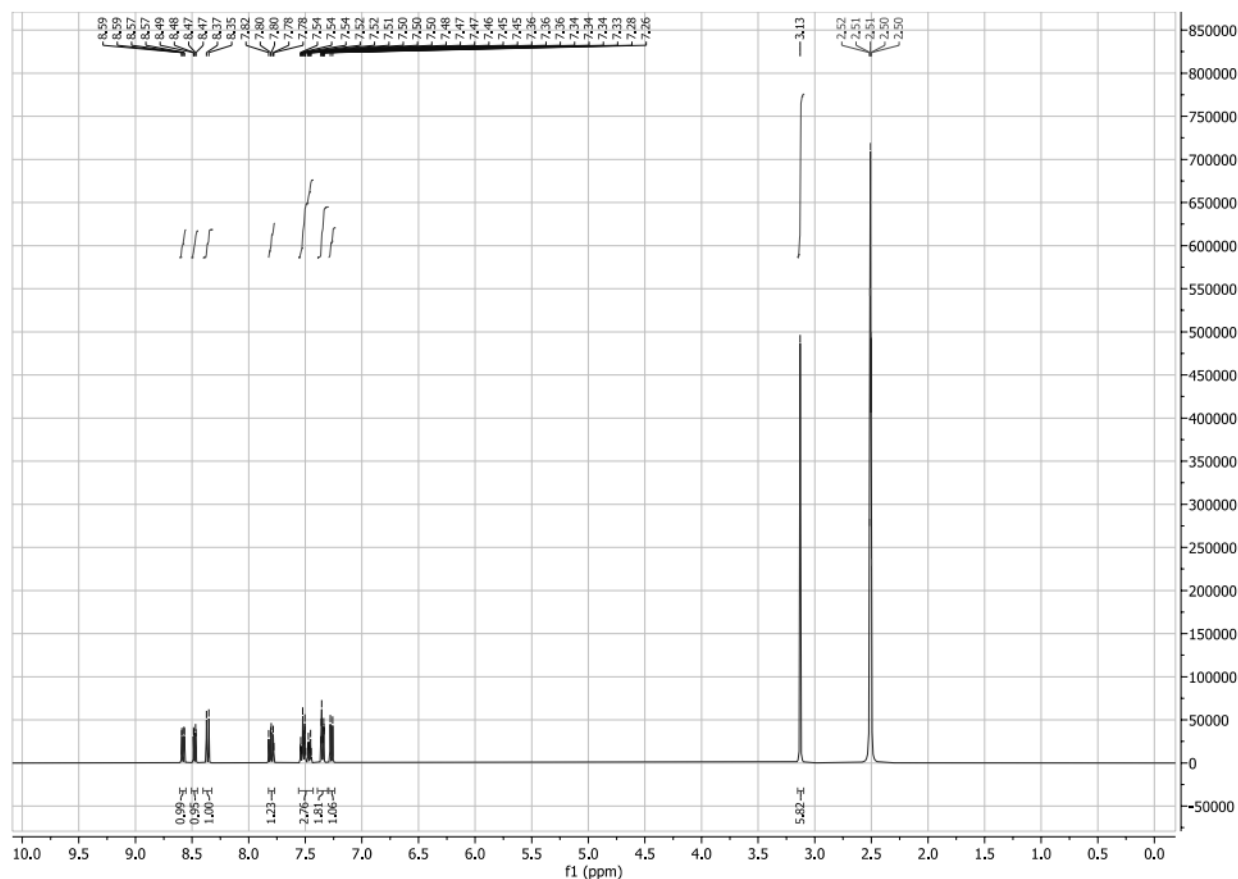

**Figure S1.**  $^1\text{H}$  NMR spectrum of ANI-Ph in  $\text{DMSO}-d_6$ .

## Refractometry

The refractive indices of the electrolyte solutions and the solvents (Figure x) are measured at an ambient temperature and pressure using Rudolph Research J357 Automatic Refractometer (Rudolph Research Analytical, Hackettstown, NJ) at the wavelength of the D-line of sodium, 589.3 nm, with an estimated  $\pm 0.00002$  precision. The refractometer operates on an artificial sapphire prism with automatic temperature control. The liquid samples solutions are allowed to reach thermal equilibrium prior to recording their refractive indices.

**Table S1.** Experimentally measured indexes of refraction of solutions of  $N(n\text{-C}_4\text{H}_9)_4\text{PF}_6$  with concentrations from 0 to 200 mM.

| $C_{el} / \text{mM}$ | $\text{CHCl}_3$ | $\text{CH}_2\text{Cl}_2$ | $(\text{CH}_2\text{Cl})_2$ | $\text{C}_6\text{H}_5\text{CN}$ | DMF     | $\text{CH}_3\text{CN}$ |
|----------------------|-----------------|--------------------------|----------------------------|---------------------------------|---------|------------------------|
| 0                    | 1.44524         | 1.42425                  | 1.34384                    | 1.47899                         | 1.44466 | 1.43038                |
| 25                   | 1.44509         | 1.42437                  | 1.34454                    | 1.47826                         | 1.44468 | 1.43036                |
| 50                   | 1.44508         | 1.42438                  | 1.34567                    | 1.47786                         | 1.44463 | 1.43045                |
| 75                   | 1.44502         | 1.42454                  | 1.34624                    | 1.47770                         | 1.44461 | 1.43046                |
| 100                  | 1.44497         | 1.42474                  | 1.34706                    | 1.47734                         | 1.44462 | 1.43050                |
| 125                  | 1.44494         | 1.42491                  | 1.34784                    | 1.47700                         | 1.44456 | 1.43046                |
| 150                  | 1.44488         | 1.42524                  | 1.34769                    | 1.47660                         | 1.44447 | 1.43051                |
| 175                  | 1.44486         | 1.42540                  | 1.34842                    | 1.47554                         | 1.44446 | 1.43052                |
| 200                  | 1.44474         | 1.42554                  | 1.35066                    | 1.47505                         | 1.44439 | 1.43052                |

## Optical Spectroscopy

Steady-state absorption spectra are recorded in a transmission mode using a JASCO V-670 spectrophotometer (Tokyo, Japan). The steady-state emission spectra are measured, using a FluoroLog-3 spectrofluorometer (Horiba-Jobin-Yvon, Edison, NJ, USA) as previously reported. The optical spectra are recorded in wavelength scales, i.e., absorbance and emission intensity vs. wavelength in nanometers ( $\lambda / \text{nm}$ ). To convert the thus measured spectra to energy scales, i.e.,  $\mathcal{E}$ , it is important not only to convert the abscissa, i.e.,  $\mathcal{E} = h c \lambda^{-1}$ , but also to correct (1) the absorbance by dividing it by  $\mathcal{E}$ , i.e.,  $A(\mathcal{E}) = A(\lambda) \mathcal{E}^{-1}$ ; and (2) the emission intensity by dividing it by  $\mathcal{E}^5$ , i.e.,  $F(\mathcal{E}) = F(\lambda) \mathcal{E}^{-5}$ . The optical spectra, plotted against  $\mathcal{E}$ , were fit to sums of Gaussian functions. The positions of the largest-amplitude components were ascribed to the spectral maxima (Figure 5b), which are used for estimating the Stokes' shifts,  $\Delta\mathcal{E}$  (Figure 2,3).

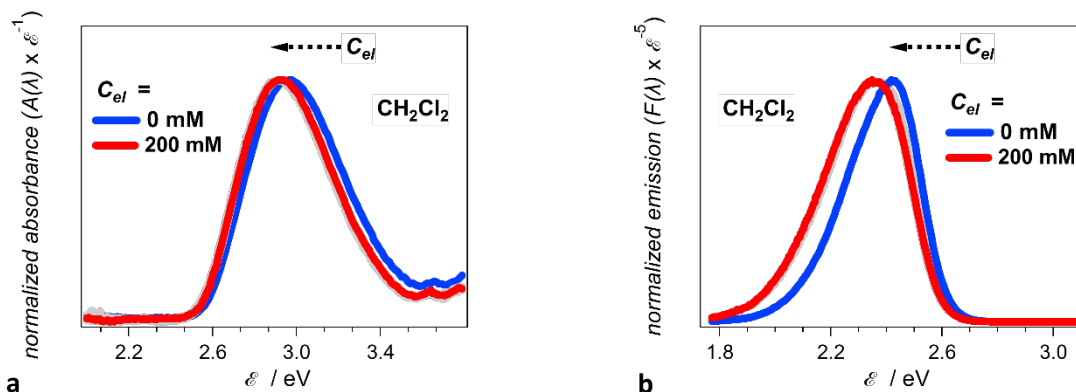

**Figure S2.** Solvent polarity effect on optical measurements. (a) Normalized absorption spectra of ANI-Ph for  $\text{CH}_2\text{Cl}_2$  in the presence of different concentrations of  $\text{N}(n\text{-C}_4\text{H}_9)_4\text{PF}_6$ . (b) Normalized fluorescence spectra of ANI-Ph for  $\text{CH}_2\text{Cl}_2$  in the presence of different concentrations of  $\text{N}(n\text{-C}_4\text{H}_9)_4\text{PF}_6$  ( $\lambda_{\text{ex}} = 421 \text{ nm}$ ).

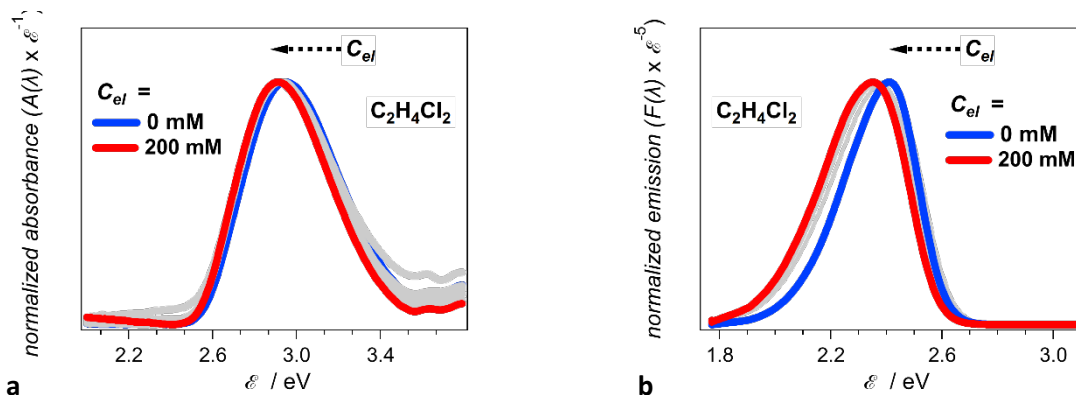

**Figure S3.** Solvent polarity effect on optical measurements. (a) Normalized absorption spectra of ANI-Ph for  $\text{C}_2\text{H}_4\text{Cl}_2$  in the presence of different concentrations of  $\text{N}(n\text{-C}_4\text{H}_9)_4\text{PF}_6$ . (b) Normalized fluorescence spectra of ANI-Ph for  $\text{C}_2\text{H}_4\text{Cl}_2$  in the presence of different concentrations of  $\text{N}(n\text{-C}_4\text{H}_9)_4\text{PF}_6$  ( $\lambda_{\text{ex}} = 421 \text{ nm}$ ).

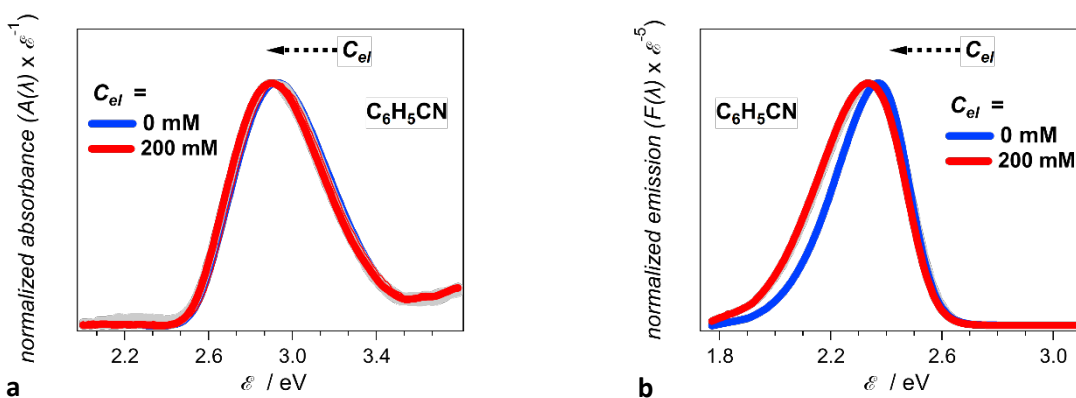

**Figure S4.** Solvent polarity effect on optical measurements. (a) Normalized absorption spectra of ANI-Ph for  $\text{C}_6\text{H}_5\text{CN}$  in the presence of different concentrations of  $\text{N}(n\text{-C}_4\text{H}_9)_4\text{PF}_6$ . (b) Normalized fluorescence spectra of ANI-Ph for  $\text{C}_6\text{H}_5\text{CN}$  in the presence of different concentrations of  $\text{N}(n\text{-C}_4\text{H}_9)_4\text{PF}_6$  ( $\lambda_{\text{ex}} = 421 \text{ nm}$ ).

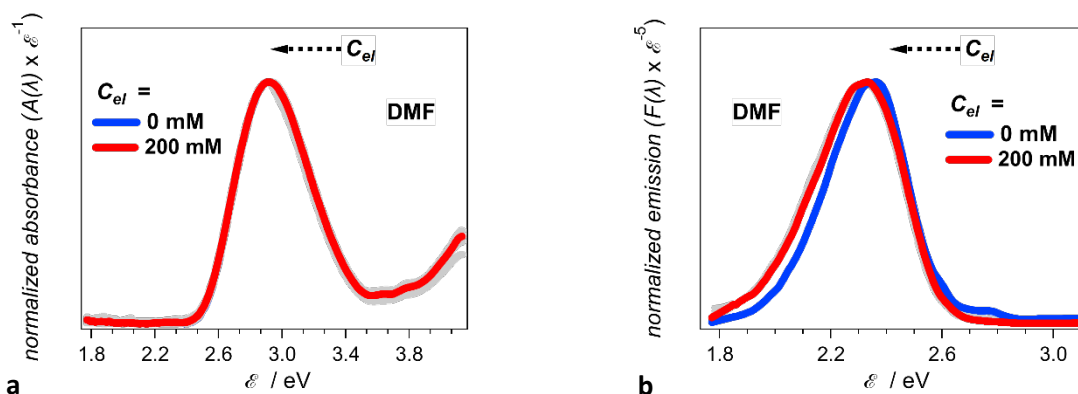

**Figure S5.** Solvent polarity effect on optical measurements. (a) Normalized absorption spectra of ANI-Ph for DMF in the presence of different concentrations of  $N(n\text{-C}_4\text{H}_9)_4\text{PF}_6$ . (b) Normalized fluorescence spectra of ANI-Ph for DMF in the presence of different concentrations of  $N(n\text{-C}_4\text{H}_9)_4\text{PF}_6$  ( $\lambda_{\text{ex}} = 421\text{ nm}$ ).

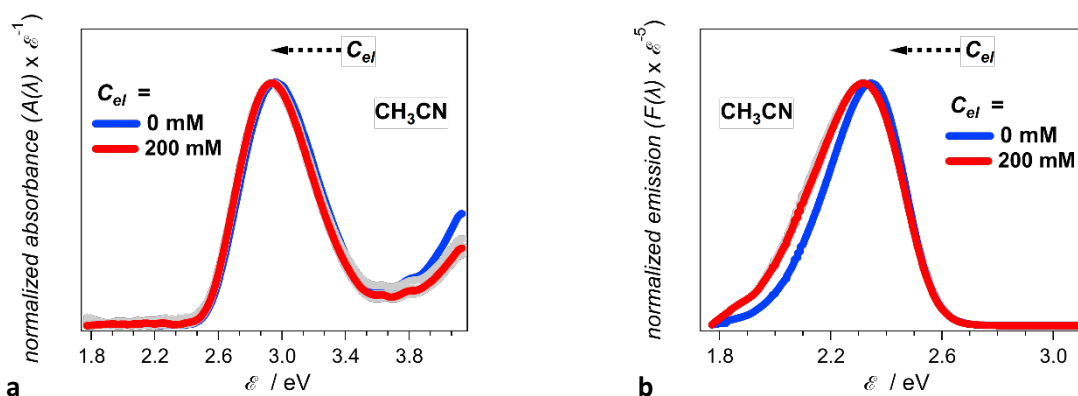

**Figure S6.** Solvent polarity effect on optical measurements. (a) Normalized absorption spectra of ANI-Ph for  $\text{CH}_3\text{CN}$  in the presence of different concentrations of  $N(n\text{-C}_4\text{H}_9)_4\text{PF}_6$ . (b) Normalized fluorescence spectra of ANI-Ph for  $\text{CH}_3\text{CN}$  in the presence of different concentrations of  $N(n\text{-C}_4\text{H}_9)_4\text{PF}_6$  ( $\lambda_{\text{ex}} = 421\text{ nm}$ ).

## Computational Analysis

The molecular structures of 4-dimethylamino-*N*-phenyl-1,8-naphthalimide (ANI-Ph), are optimized using the Gaussian 09 program package within the Hartree-Fock (HF) theory framework, employing the 6-31G(d,p) basis set. For the excited-states' calculations of ANI-Ph, we resort to the configuration interaction singles (CIS) method using single-excitation CI, i.e., CI-Singles. Solvation effects are implemented with the integral equation formalism variant of the polarizable continuum model (IEFPCM).

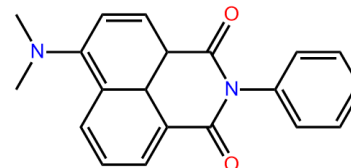

**Figure S7.** Structure of ANI-Ph.

From the optimized structures, we estimate the permanent electric dipole moments of the ground and the fluorescent excited state. The dipoles of the ground and the excited state are practically parallel, and the solvents have negligible effects on their magnitudes and orientation (Table 1).

The natural transition orbitals (NTOs) represent the electronic transition of optical excitation and emission, with occupation numbers of 0.97 or higher. Varying the solvent has minimal impacts on the NTOs (Figures 1, S8).

**NTOs:**

**electron**

**hole**

$S_0 \rightarrow S_1$   
(CH<sub>2</sub>Cl<sub>2</sub>)

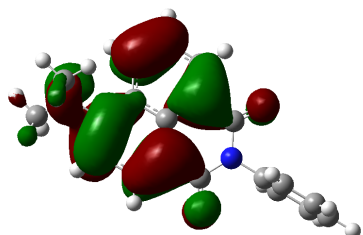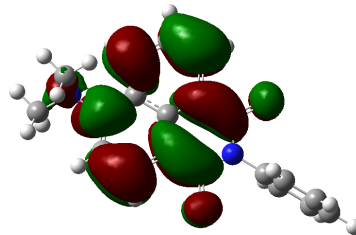

$S_1 \rightarrow S_0$   
(CH<sub>2</sub>Cl<sub>2</sub>)

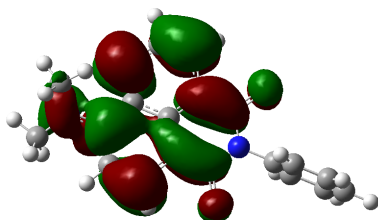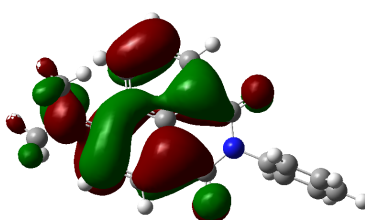

$S_0 \rightarrow S_1$   
(C<sub>2</sub>H<sub>4</sub>Cl<sub>2</sub>)

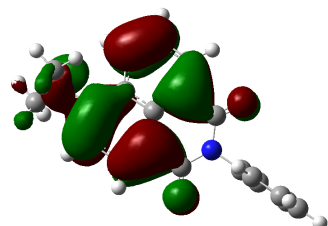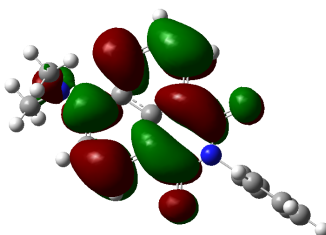

$S_1 \rightarrow S_0$   
(C<sub>2</sub>H<sub>4</sub>Cl<sub>2</sub>)

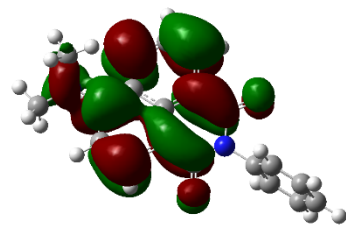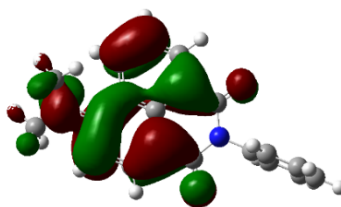

$S_0 \rightarrow S_1$   
(C<sub>6</sub>H<sub>5</sub>CN)

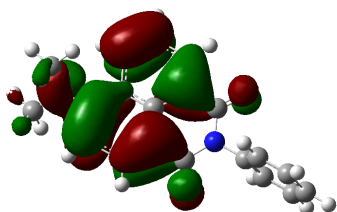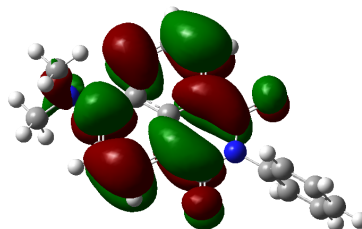

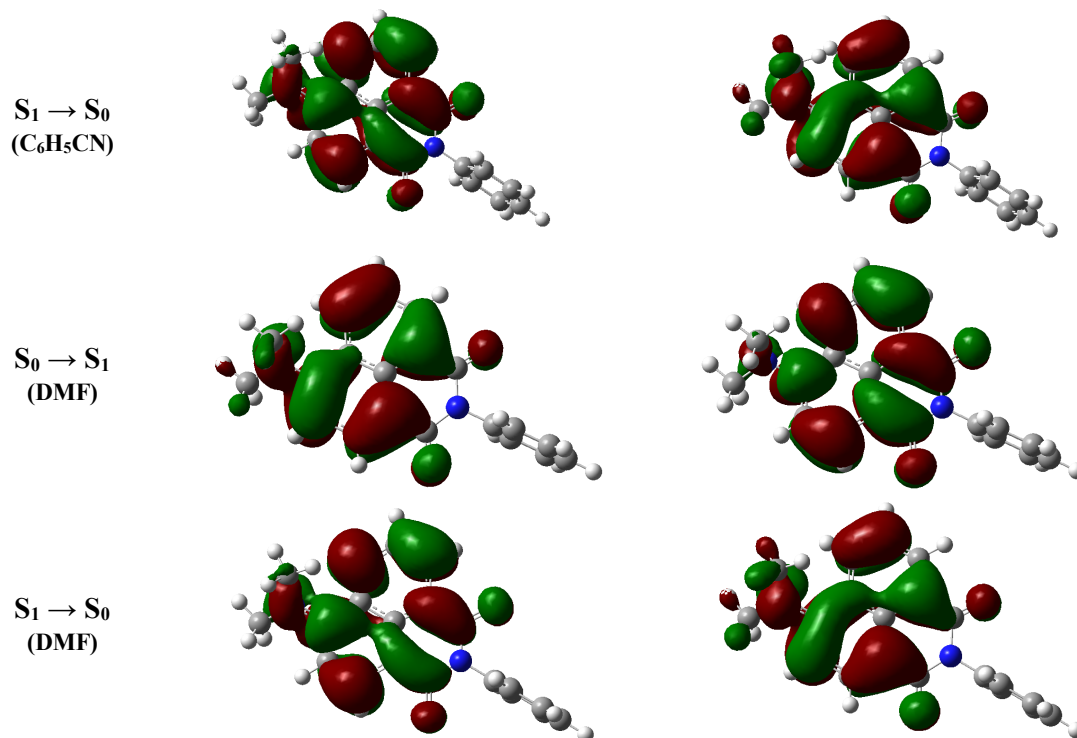

**Figure S8.** Natural transition orbitals (NTOs) for optical absorption,  $S_0 \rightarrow S_1$ , and emission,  $S_1 \rightarrow S_0$ , for  $\text{CH}_2\text{Cl}_2$ ,  $(\text{CH}_2\text{Cl})_2$ ,  $\text{C}_6\text{H}_5\text{CN}$ , and DMF.

**Table S2.** XYZ atomic coordinates for ANI-Ph in  $\text{CHCl}_3$ ,  $\text{CH}_2\text{Cl}_2$ ,  $(\text{CH}_2\text{Cl})_2$ ,  $\text{C}_6\text{H}_5\text{CN}$ , DMF, and  $\text{CH}_3\text{CN}$  as implicit solvents.

| Optimized Ground State in $\text{CHCl}_3$ |          |          |          | Optimized Excited State in $\text{CHCl}_3$ |          |          |          |
|-------------------------------------------|----------|----------|----------|--------------------------------------------|----------|----------|----------|
| C                                         | -1.0357  | 0.349595 | -0.06668 | C                                          | -1.01941 | 0.345093 | -0.07208 |
| C                                         | -2.43134 | 0.521458 | -0.09785 | C                                          | -2.44443 | 0.519023 | -0.11492 |
| C                                         | -2.94228 | 1.839981 | -0.19596 | C                                          | -2.93973 | 1.803393 | -0.27073 |
| C                                         | -2.10976 | 2.919882 | -0.21406 | C                                          | -2.07633 | 2.926361 | -0.28023 |
| C                                         | -0.71636 | 2.740636 | -0.14215 | C                                          | -0.72522 | 2.77477  | -0.17108 |
| C                                         | -0.18881 | 1.48165  | -0.07755 | C                                          | -0.17928 | 1.474467 | -0.08107 |
| C                                         | -0.47906 | -0.95059 | -0.05126 | C                                          | -0.47014 | -0.9401  | -0.08501 |
| C                                         | -1.30516 | -2.0359  | -0.07621 | C                                          | -1.30266 | -2.09468 | -0.1681  |
| C                                         | -2.70308 | -1.88117 | -0.08305 | C                                          | -2.65155 | -1.95274 | -0.16846 |
| C                                         | -3.27811 | -0.63791 | -0.07249 | C                                          | -3.27414 | -0.66686 | -0.06371 |
| C                                         | 1.281899 | 1.312084 | -0.02991 | C                                          | 1.269298 | 1.317082 | -0.02655 |
| N                                         | 1.770473 | 0.009328 | -0.00734 | N                                          | 1.763912 | 0.013739 | -0.0071  |
| C                                         | 0.984749 | -1.1411  | -0.02428 | C                                          | 0.982593 | -1.12887 | -0.04946 |
| C                                         | 3.200663 | -0.16273 | 0.029027 | C                                          | 3.192419 | -0.15768 | 0.043975 |
| C                                         | 3.909409 | -0.25163 | -1.15481 | C                                          | 3.915107 | -0.24273 | -1.13198 |
| C                                         | 5.284122 | -0.41789 | -1.11842 | C                                          | 5.289177 | -0.41008 | -1.08116 |
| C                                         | 5.942893 | -0.49468 | 0.098573 | C                                          | 5.934908 | -0.49202 | 0.142567 |
| C                                         | 5.224987 | -0.40442 | 1.280593 | C                                          | 5.203705 | -0.4057  | 1.316709 |
| C                                         | 3.850128 | -0.23805 | 1.247194 | C                                          | 3.829355 | -0.23837 | 1.268667 |
| O                                         | 1.495695 | -2.2254  | -0.01512 | O                                          | 1.482885 | -2.22758 | -0.05151 |
| O                                         | 2.034578 | 2.244248 | -0.01289 | O                                          | 2.030195 | 2.254921 | 0.000716 |

|                                                               |          |          |          |  |                                                                |          |          |          |
|---------------------------------------------------------------|----------|----------|----------|--|----------------------------------------------------------------|----------|----------|----------|
| N                                                             | -4.67498 | -0.44078 | -0.05324 |  | N                                                              | -4.62406 | -0.57303 | 0.067157 |
| C                                                             | -5.20672 | -0.05453 | 1.250341 |  | C                                                              | -5.24592 | 0.271238 | 1.084009 |
| C                                                             | -5.48466 | -1.4708  | -0.67904 |  | C                                                              | -5.48868 | -1.64724 | -0.38526 |
| H                                                             | -4.00277 | 1.978016 | -0.27591 |  | H                                                              | -3.99058 | 1.964162 | -0.40521 |
| H                                                             | -2.51346 | 3.912325 | -0.29341 |  | H                                                              | -2.50601 | 3.907535 | -0.37074 |
| H                                                             | -0.0572  | 3.587566 | -0.15214 |  | H                                                              | -0.0632  | 3.617786 | -0.16861 |
| H                                                             | -0.87882 | -3.0211  | -0.0721  |  | H                                                              | -0.84421 | -3.06202 | -0.20548 |
| H                                                             | -3.31554 | -2.76166 | -0.07688 |  | H                                                              | -3.27016 | -2.82811 | -0.18195 |
| H                                                             | 3.389555 | -0.19163 | -2.09386 |  | H                                                              | 3.405732 | -0.17809 | -2.07641 |
| H                                                             | 5.837394 | -0.48745 | -2.03777 |  | H                                                              | 5.852479 | -0.47618 | -1.99477 |
| H                                                             | 7.010209 | -0.624   | 0.125641 |  | H                                                              | 7.001863 | -0.62198 | 0.180876 |
| H                                                             | 5.732162 | -0.46332 | 2.226881 |  | H                                                              | 5.700285 | -0.46828 | 2.268483 |
| H                                                             | 3.284606 | -0.16725 | 2.158692 |  | H                                                              | 3.253822 | -0.17027 | 2.174075 |
| H                                                             | -4.61009 | 0.731728 | 1.690229 |  | H                                                              | -4.5156  | 0.901721 | 1.561395 |
| H                                                             | -5.2277  | -0.89517 | 1.944732 |  | H                                                              | -5.69898 | -0.36335 | 1.841954 |
| H                                                             | -6.21806 | 0.314058 | 1.126236 |  | H                                                              | -6.02244 | 0.888635 | 0.646507 |
| H                                                             | -5.0792  | -1.72264 | -1.65023 |  | H                                                              | -5.1247  | -2.062   | -1.31409 |
| H                                                             | -6.4862  | -1.08169 | -0.81934 |  | H                                                              | -6.47573 | -1.23718 | -0.56026 |
| H                                                             | -5.56241 | -2.38167 | -0.0848  |  | H                                                              | -5.58063 | -2.44222 | 0.353314 |
| <b>Optimized Ground State in CH<sub>2</sub>Cl<sub>2</sub></b> |          |          |          |  | <b>Optimized Excited State in CH<sub>2</sub>Cl<sub>2</sub></b> |          |          |          |
| C                                                             | -1.03524 | 0.349196 | -0.06726 |  | C                                                              | -1.01903 | 0.34456  | -0.07269 |
| C                                                             | -2.43092 | 0.521046 | -0.09797 |  | C                                                              | -2.44398 | 0.519059 | -0.11399 |
| C                                                             | -2.94177 | 1.839588 | -0.19639 |  | C                                                              | -2.93921 | 1.802724 | -0.27038 |
| C                                                             | -2.10953 | 2.919911 | -0.21485 |  | C                                                              | -2.07552 | 2.925916 | -0.28042 |
| C                                                             | -0.71638 | 2.740672 | -0.14303 |  | C                                                              | -0.72464 | 2.774654 | -0.17142 |
| C                                                             | -0.18853 | 1.481463 | -0.07835 |  | C                                                              | -0.17821 | 1.474576 | -0.08166 |
| C                                                             | -0.47863 | -0.95105 | -0.05243 |  | C                                                              | -0.46978 | -0.94061 | -0.08757 |
| C                                                             | -1.30537 | -2.03638 | -0.07837 |  | C                                                              | -1.30299 | -2.09502 | -0.17302 |
| C                                                             | -2.70292 | -1.88202 | -0.08525 |  | C                                                              | -2.65152 | -1.95322 | -0.17162 |
| C                                                             | -3.27822 | -0.63844 | -0.07286 |  | C                                                              | -3.27506 | -0.66784 | -0.06236 |
| C                                                             | 1.281303 | 1.31141  | -0.0312  |  | C                                                              | 1.268977 | 1.316502 | -0.02799 |
| N                                                             | 1.76986  | 0.009192 | -0.00785 |  | N                                                              | 1.763302 | 0.013839 | -0.00816 |
| C                                                             | 0.984213 | -1.14082 | -0.02495 |  | C                                                              | 0.982031 | -1.12839 | -0.05149 |
| C                                                             | 3.199933 | -0.16278 | 0.029365 |  | C                                                              | 3.191634 | -0.15776 | 0.04433  |
| C                                                             | 3.909424 | -0.25143 | -1.15432 |  | C                                                              | 3.91576  | -0.24182 | -1.1311  |
| C                                                             | 5.284388 | -0.41748 | -1.11695 |  | C                                                              | 5.29004  | -0.40905 | -1.0787  |
| C                                                             | 5.94248  | -0.49416 | 0.100668 |  | C                                                              | 5.934448 | -0.49172 | 0.145928 |
| C                                                             | 5.223695 | -0.40414 | 1.28243  |  | C                                                              | 5.201728 | -0.40645 | 1.319453 |
| C                                                             | 3.848574 | -0.23799 | 1.248259 |  | C                                                              | 3.827147 | -0.23929 | 1.269994 |
| O                                                             | 1.497081 | -2.22526 | -0.01541 |  | O                                                              | 1.484761 | -2.22732 | -0.05387 |
| O                                                             | 2.03569  | 2.243367 | -0.01509 |  | O                                                              | 2.032232 | 2.254445 | -0.00149 |
| N                                                             | -4.67431 | -0.44173 | -0.05376 |  | N                                                              | -4.62263 | -0.57629 | 0.072512 |
| C                                                             | -5.2065  | -0.0455  | 1.247272 |  | C                                                              | -5.24799 | 0.280059 | 1.077616 |
| C                                                             | -5.48482 | -1.47701 | -0.67069 |  | C                                                              | -5.48874 | -1.65179 | -0.37632 |
| H                                                             | -4.00215 | 1.978375 | -0.27587 |  | H                                                              | -3.98987 | 1.964693 | -0.40335 |
| H                                                             | -2.51343 | 3.912168 | -0.29416 |  | H                                                              | -2.50552 | 3.906905 | -0.37076 |
| H                                                             | -0.05824 | 3.588362 | -0.15327 |  | H                                                              | -0.06407 | 3.618828 | -0.16918 |
| H                                                             | -0.88032 | -3.02212 | -0.07477 |  | H                                                              | -0.84629 | -3.06299 | -0.21368 |

|                                                                 |          |          |          |  |                                                                  |          |          |          |
|-----------------------------------------------------------------|----------|----------|----------|--|------------------------------------------------------------------|----------|----------|----------|
| H                                                               | -3.31487 | -2.7627  | -0.0798  |  | H                                                                | -3.26959 | -2.82887 | -0.18623 |
| H                                                               | 3.390186 | -0.1914  | -2.09374 |  | H                                                                | 3.407584 | -0.17666 | -2.07619 |
| H                                                               | 5.838283 | -0.48686 | -2.0359  |  | H                                                                | 5.854424 | -0.47449 | -1.99164 |
| H                                                               | 7.009754 | -0.62326 | 0.128415 |  | H                                                                | 7.001313 | -0.62155 | 0.185393 |
| H                                                               | 5.73027  | -0.463   | 2.229004 |  | H                                                                | 5.69717  | -0.46974 | 2.271728 |
| H                                                               | 3.28245  | -0.16731 | 2.159423 |  | H                                                                | 3.250598 | -0.1721  | 2.174871 |
| C                                                               | -1.03524 | 0.349196 | -0.06726 |  | H                                                                | -4.51687 | 0.904231 | 1.561864 |
| C                                                               | -2.43092 | 0.521046 | -0.09797 |  | H                                                                | -5.71627 | -0.34784 | 1.831375 |
| C                                                               | -2.94177 | 1.839588 | -0.19639 |  | H                                                                | -6.01283 | 0.903377 | 0.628423 |
| C                                                               | -2.10953 | 2.919911 | -0.21485 |  | H                                                                | -5.12686 | -2.06827 | -1.30508 |
| C                                                               | -0.71638 | 2.740672 | -0.14303 |  | H                                                                | -6.47579 | -1.24142 | -0.54929 |
| C                                                               | -0.18853 | 1.481463 | -0.07835 |  | H                                                                | -5.57828 | -2.44443 | 0.364526 |
| <b>Optimized Ground State in (CH<sub>2</sub>Cl)<sub>2</sub></b> |          |          |          |  | <b>Optimized Excited State in (CH<sub>2</sub>Cl)<sub>2</sub></b> |          |          |          |
| C                                                               | -1.03517 | 0.349149 | -0.06735 |  | C                                                                | -1.01897 | 0.344483 | -0.07273 |
| C                                                               | -2.43085 | 0.521012 | -0.09795 |  | C                                                                | -2.44391 | 0.519076 | -0.11382 |
| C                                                               | -2.94169 | 1.839567 | -0.19637 |  | C                                                                | -2.93912 | 1.802655 | -0.27025 |
| C                                                               | -2.10947 | 2.919939 | -0.21489 |  | C                                                                | -2.07539 | 2.925867 | -0.28031 |
| C                                                               | -0.71635 | 2.740686 | -0.14315 |  | C                                                                | -0.72453 | 2.774636 | -0.17135 |
| C                                                               | -0.18847 | 1.481441 | -0.07849 |  | C                                                                | -0.17805 | 1.474583 | -0.08169 |
| C                                                               | -0.47858 | -0.95111 | -0.05264 |  | C                                                                | -0.46974 | -0.94069 | -0.08788 |
| C                                                               | -1.30542 | -2.03643 | -0.07873 |  | C                                                                | -1.30306 | -2.09506 | -0.17365 |
| C                                                               | -2.70291 | -1.88211 | -0.0856  |  | C                                                                | -2.65155 | -1.95327 | -0.17206 |
| C                                                               | -3.27823 | -0.63848 | -0.0729  |  | C                                                                | -3.2752  | -0.66796 | -0.0622  |
| C                                                               | 1.281232 | 1.311297 | -0.03147 |  | C                                                                | 1.268942 | 1.316396 | -0.02816 |
| N                                                               | 1.769767 | 0.009151 | -0.00796 |  | N                                                                | 1.763217 | 0.013828 | -0.00829 |
| C                                                               | 0.984122 | -1.14079 | -0.02508 |  | C                                                                | 0.981941 | -1.12834 | -0.05174 |
| C                                                               | 3.199816 | -0.16282 | 0.02941  |  | C                                                                | 3.191522 | -0.1578  | 0.044362 |
| C                                                               | 3.909453 | -0.25144 | -1.15423 |  | C                                                                | 3.915855 | -0.2415  | -1.13101 |
| C                                                               | 5.284455 | -0.41744 | -1.11668 |  | C                                                                | 5.29017  | -0.4087  | -1.07841 |
| C                                                               | 5.942413 | -0.49408 | 0.101053 |  | C                                                                | 5.934396 | -0.49165 | 0.146324 |
| C                                                               | 5.223466 | -0.40409 | 1.282757 |  | C                                                                | 5.201461 | -0.40675 | 1.319779 |
| C                                                               | 3.848305 | -0.23799 | 1.248431 |  | C                                                                | 3.826842 | -0.23963 | 1.270152 |
| O                                                               | 1.49725  | -2.22526 | -0.0155  |  | O                                                                | 1.48501  | -2.22731 | -0.05417 |
| O                                                               | 2.03588  | 2.243214 | -0.01555 |  | O                                                                | 2.032541 | 2.254353 | -0.00179 |
| N                                                               | -4.67423 | -0.44181 | -0.0538  |  | N                                                                | -4.62245 | -0.5767  | 0.07316  |
| C                                                               | -5.20645 | -0.0444  | 1.246953 |  | C                                                                | -5.24832 | 0.281222 | 1.076687 |
| C                                                               | -5.48485 | -1.47777 | -0.6696  |  | C                                                                | -5.48875 | -1.65236 | -0.37525 |
| H                                                               | -4.00205 | 1.97848  | -0.27573 |  | H                                                                | -3.98975 | 1.964805 | -0.403   |
| H                                                               | -2.51339 | 3.912175 | -0.29416 |  | H                                                                | -2.50543 | 3.906836 | -0.37058 |
| H                                                               | -0.05835 | 3.588479 | -0.15343 |  | H                                                                | -0.06417 | 3.618975 | -0.1691  |
| H                                                               | -0.88056 | -3.02226 | -0.07523 |  | H                                                                | -0.84662 | -3.06313 | -0.21475 |
| H                                                               | -3.31481 | -2.76281 | -0.08028 |  | H                                                                | -3.26954 | -2.82895 | -0.18683 |
| H                                                               | 3.390328 | -0.19141 | -2.09372 |  | H                                                                | 3.407843 | -0.17613 | -2.07618 |
| H                                                               | 5.838465 | -0.48679 | -2.03555 |  | H                                                                | 5.854708 | -0.47387 | -1.99128 |
| H                                                               | 7.009683 | -0.62312 | 0.12893  |  | H                                                                | 7.001253 | -0.62144 | 0.185929 |
| H                                                               | 5.729927 | -0.46292 | 2.229388 |  | H                                                                | 5.696747 | -0.47028 | 2.272112 |
| H                                                               | 3.282064 | -0.16732 | 2.159529 |  | H                                                                | 3.250148 | -0.17272 | 2.174965 |
| H                                                               | -4.60819 | 0.742763 | 1.682654 |  | H                                                                | -4.51716 | 0.904635 | 1.561834 |



|                                                               |          |          |          |  |                                                                |          |          |          |
|---------------------------------------------------------------|----------|----------|----------|--|----------------------------------------------------------------|----------|----------|----------|
| H                                                             | -5.23076 | -0.88076 | 1.946109 |  | H                                                              | -5.71855 | -0.34582 | 1.829881 |
| H                                                             | -6.21637 | 0.326289 | 1.118834 |  | H                                                              | -6.01165 | 0.905224 | 0.625929 |
| H                                                             | -5.08179 | -1.7372  | -1.6398  |  | H                                                              | -5.12711 | -2.06903 | -1.30401 |
| H                                                             | -6.48685 | -1.09014 | -0.81007 |  | H                                                              | -6.47578 | -1.24193 | -0.54796 |
| H                                                             | -5.56015 | -2.38346 | -0.06762 |  | H                                                              | -5.57797 | -2.44471 | 0.365869 |
| <b>Optimized Ground State in C<sub>6</sub>H<sub>5</sub>CN</b> |          |          |          |  | <b>Optimized Excited State in C<sub>6</sub>H<sub>5</sub>CN</b> |          |          |          |
| C                                                             | -1.03483 | 0.34891  | -0.06786 |  | C                                                              | -1.01869 | 0.344089 | -0.07283 |
| C                                                             | -2.43053 | 0.520887 | -0.09779 |  | C                                                              | -2.44357 | 0.519176 | -0.11289 |
| C                                                             | -2.94124 | 1.839526 | -0.19598 |  | C                                                              | -2.93866 | 1.802383 | -0.26939 |
| C                                                             | -2.10911 | 2.920101 | -0.21489 |  | C                                                              | -2.07469 | 2.925651 | -0.27943 |
| C                                                             | -0.71612 | 2.740725 | -0.14378 |  | C                                                              | -0.72393 | 2.774534 | -0.17065 |
| C                                                             | -0.18816 | 1.481279 | -0.07937 |  | C                                                              | -0.17723 | 1.474585 | -0.08159 |
| C                                                             | -0.47838 | -0.95143 | -0.05371 |  | C                                                              | -0.46956 | -0.94111 | -0.08947 |
| C                                                             | -1.30572 | -2.03672 | -0.08043 |  | C                                                              | -1.30342 | -2.09526 | -0.17673 |
| C                                                             | -2.70296 | -1.8825  | -0.08719 |  | C                                                              | -2.65172 | -1.95343 | -0.17402 |
| C                                                             | -3.27834 | -0.63861 | -0.07299 |  | C                                                              | -3.27589 | -0.66844 | -0.06137 |
| C                                                             | 1.280934 | 1.310662 | -0.03317 |  | C                                                              | 1.268807 | 1.315812 | -0.0288  |
| N                                                             | 1.769323 | 0.008844 | -0.0087  |  | N                                                              | 1.762821 | 0.013687 | -0.00905 |
| C                                                             | 0.983635 | -1.14071 | -0.02581 |  | C                                                              | 0.9815   | -1.12815 | -0.05325 |
| C                                                             | 3.199243 | -0.16317 | 0.029604 |  | C                                                              | 3.190991 | -0.15813 | 0.044431 |
| C                                                             | 3.909724 | -0.25194 | -1.15374 |  | C                                                              | 3.916527 | -0.23899 | -1.13063 |
| C                                                             | 5.284919 | -0.41759 | -1.1151  |  | C                                                              | 5.291025 | -0.4059  | -1.07704 |
| C                                                             | 5.942129 | -0.49349 | 0.103262 |  | C                                                              | 5.934192 | -0.49118 | 0.148282 |
| C                                                             | 5.222276 | -0.40332 | 1.284589 |  | C                                                              | 5.200028 | -0.40914 | 1.321357 |
| C                                                             | 3.846905 | -0.23761 | 1.249332 |  | C                                                              | 3.825207 | -0.24235 | 1.270852 |
| O                                                             | 1.497927 | -2.22534 | -0.01593 |  | O                                                              | 1.486165 | -2.22732 | -0.05622 |
| O                                                             | 2.036837 | 2.242384 | -0.01854 |  | O                                                              | 2.034053 | 2.25384  | -0.00281 |
| N                                                             | -4.67384 | -0.44207 | -0.05389 |  | N                                                              | -4.62167 | -0.57849 | 0.076078 |
| C                                                             | -5.20617 | -0.03934 | 1.245597 |  | C                                                              | -5.25008 | 0.286638 | 1.07216  |
| C                                                             | -5.48501 | -1.48106 | -0.66455 |  | C                                                              | -5.48874 | -1.65491 | -0.37057 |
| H                                                             | -4.00153 | 1.979103 | -0.27454 |  | H                                                              | -3.98915 | 1.96542  | -0.40114 |
| H                                                             | -2.51312 | 3.912255 | -0.29377 |  | H                                                              | -2.5049  | 3.906539 | -0.36929 |
| H                                                             | -0.05876 | 3.588987 | -0.15436 |  | H                                                              | -0.06455 | 3.619662 | -0.16824 |
| H                                                             | -0.88183 | -3.02295 | -0.07744 |  | H                                                              | -0.84828 | -3.06381 | -0.21995 |
| H                                                             | -3.31463 | -2.76327 | -0.08243 |  | H                                                              | -3.26944 | -2.82925 | -0.1895  |
| H                                                             | 3.391227 | -0.19226 | -2.09362 |  | H                                                              | 3.409431 | -0.17178 | -2.0762  |
| H                                                             | 5.839591 | -0.48709 | -2.03354 |  | H                                                              | 5.856456 | -0.46896 | -1.98946 |
| H                                                             | 7.009391 | -0.62214 | 0.131916 |  | H                                                              | 7.00101  | -0.62068 | 0.188616 |
| H                                                             | 5.728103 | -0.46161 | 2.231565 |  | H                                                              | 5.694426 | -0.47461 | 2.273985 |
| H                                                             | 3.279998 | -0.16666 | 2.160021 |  | H                                                              | 3.247663 | -0.17762 | 2.175315 |
| H                                                             | -4.60751 | 0.748655 | 1.679025 |  | H                                                              | -4.51896 | 0.906679 | 1.561571 |
| H                                                             | -5.23142 | -0.87361 | 1.947066 |  | H                                                              | -5.72935 | -0.33643 | 1.822622 |
| H                                                             | -6.21564 | 0.331692 | 1.115686 |  | H                                                              | -6.00639 | 0.913603 | 0.614011 |
| H                                                             | -5.08318 | -1.74447 | -1.6342  |  | H                                                              | -5.1281  | -2.0724  | -1.29928 |
| H                                                             | -6.4872  | -1.09408 | -0.80511 |  | H                                                              | -6.47569 | -1.2442  | -0.54216 |
| H                                                             | -5.55911 | -2.38402 | -0.0586  |  | H                                                              | -5.5766  | -2.44594 | 0.371775 |
| <b>Optimized Ground State in DMF</b>                          |          |          |          |  | <b>Optimized Excited State in DMF</b>                          |          |          |          |

|                                                   |          |          |          |  |                                                    |          |          |          |
|---------------------------------------------------|----------|----------|----------|--|----------------------------------------------------|----------|----------|----------|
| C                                                 | -1.03476 | 0.348856 | -0.06799 |  | C                                                  | -1.01863 | 0.343996 | -0.07276 |
| C                                                 | -2.43046 | 0.520866 | -0.09773 |  | C                                                  | -2.4435  | 0.519199 | -0.11264 |
| C                                                 | -2.94114 | 1.839528 | -0.19583 |  | C                                                  | -2.93854 | 1.802331 | -0.26919 |
| C                                                 | -2.10901 | 2.92014  | -0.21483 |  | C                                                  | -2.07452 | 2.925603 | -0.27917 |
| C                                                 | -0.71606 | 2.740728 | -0.14393 |  | C                                                  | -0.72379 | 2.774505 | -0.17036 |
| C                                                 | -0.18808 | 1.481233 | -0.0796  |  | C                                                  | -0.17704 | 1.474574 | -0.08144 |
| C                                                 | -0.47835 | -0.9515  | -0.05396 |  | C                                                  | -0.46953 | -0.94122 | -0.08974 |
| C                                                 | -1.3058  | -2.03678 | -0.08082 |  | C                                                  | -1.3035  | -2.0953  | -0.17732 |
| C                                                 | -2.70298 | -1.88258 | -0.08754 |  | C                                                  | -2.65177 | -1.95346 | -0.17439 |
| C                                                 | -3.27836 | -0.63863 | -0.073   |  | C                                                  | -3.27604 | -0.66853 | -0.0612  |
| C                                                 | 1.280876 | 1.310504 | -0.03365 |  | C                                                  | 1.268784 | 1.315665 | -0.02879 |
| N                                                 | 1.769228 | 0.008755 | -0.0089  |  | N                                                  | 1.762739 | 0.013634 | -0.00918 |
| C                                                 | 0.983518 | -1.1407  | -0.02598 |  | C                                                  | 0.981402 | -1.12813 | -0.05357 |
| C                                                 | 3.199116 | -0.16327 | 0.029641 |  | C                                                  | 3.19088  | -0.15823 | 0.044425 |
| C                                                 | 3.909812 | -0.25216 | -1.15361 |  | C                                                  | 3.916672 | -0.23815 | -1.1306  |
| C                                                 | 5.285052 | -0.4177  | -1.1147  |  | C                                                  | 5.291216 | -0.40496 | -1.07684 |
| C                                                 | 5.942077 | -0.49332 | 0.103824 |  | C                                                  | 5.934167 | -0.49104 | 0.148576 |
| C                                                 | 5.221998 | -0.40304 | 1.285046 |  | C                                                  | 5.199744 | -0.40995 | 1.321596 |
| C                                                 | 3.846576 | -0.23745 | 1.249545 |  | C                                                  | 3.824872 | -0.24326 | 1.270956 |
| O                                                 | 1.498048 | -2.22538 | -0.016   |  | O                                                  | 1.486411 | -2.22734 | -0.05675 |
| O                                                 | 2.037055 | 2.242185 | -0.01939 |  | O                                                  | 2.034386 | 2.253711 | -0.00283 |
| N                                                 | -4.67376 | -0.4421  | -0.05388 |  | N                                                  | -4.62152 | -0.57886 | 0.07661  |
| C                                                 | -5.20609 | -0.03831 | 1.245361 |  | C                                                  | -5.25054 | 0.287827 | 1.071026 |
| C                                                 | -5.48507 | -1.48168 | -0.6635  |  | C                                                  | -5.48873 | -1.65545 | -0.3697  |
| H                                                 | -4.00142 | 1.979258 | -0.27415 |  | H                                                  | -3.98899 | 1.965564 | -0.40078 |
| H                                                 | -2.51305 | 3.912281 | -0.29359 |  | H                                                  | -2.50476 | 3.906475 | -0.36896 |
| H                                                 | -0.05883 | 3.589087 | -0.15459 |  | H                                                  | -0.06461 | 3.619804 | -0.16787 |
| H                                                 | -0.88213 | -3.02311 | -0.07793 |  | H                                                  | -0.84866 | -3.06397 | -0.22098 |
| H                                                 | -3.31461 | -2.76336 | -0.08289 |  | H                                                  | -3.26943 | -2.8293  | -0.19004 |
| H                                                 | 3.39147  | -0.19263 | -2.09359 |  | H                                                  | 3.409761 | -0.1703  | -2.07624 |
| H                                                 | 5.83989  | -0.4873  | -2.03302 |  | H                                                  | 5.856836 | -0.46732 | -1.98919 |
| H                                                 | 7.009337 | -0.62186 | 0.13268  |  | H                                                  | 7.000981 | -0.62046 | 0.189026 |
| H                                                 | 5.727667 | -0.46112 | 2.232114 |  | H                                                  | 5.69396  | -0.47607 | 2.274266 |
| H                                                 | 3.279503 | -0.16636 | 2.160126 |  | H                                                  | 3.247149 | -0.17924 | 2.175362 |
| H                                                 | -4.60727 | 0.749772 | 1.678383 |  | H                                                  | -4.51949 | 0.907177 | 1.561391 |
| H                                                 | -5.23162 | -0.87219 | 1.94725  |  | H                                                  | -5.73179 | -0.33438 | 1.820868 |
| H                                                 | -6.21543 | 0.332902 | 1.115096 |  | H                                                  | -6.00533 | 0.915384 | 0.611222 |
| H                                                 | -5.0835  | -1.74591 | -1.63305 |  | H                                                  | -5.12823 | -2.07314 | -1.29836 |
| H                                                 | -6.48728 | -1.0948  | -0.80408 |  | H                                                  | -6.47564 | -1.24467 | -0.54114 |
| H                                                 | -5.55893 | -2.38409 | -0.05675 |  | H                                                  | -5.57636 | -2.44617 | 0.372928 |
| <b>Optimized Ground State in CH<sub>3</sub>CN</b> |          |          |          |  | <b>Optimized Excited State in CH<sub>3</sub>CN</b> |          |          |          |
| C                                                 | -1.03477 | 0.348861 | -0.06798 |  | C                                                  | -1.01864 | 0.344005 | -0.07277 |
| C                                                 | -2.43047 | 0.520868 | -0.09774 |  | C                                                  | -2.44351 | 0.519196 | -0.11266 |
| C                                                 | -2.94115 | 1.839527 | -0.19584 |  | C                                                  | -2.93855 | 1.802336 | -0.26921 |
| C                                                 | -2.10902 | 2.920137 | -0.21484 |  | C                                                  | -2.07454 | 2.925608 | -0.2792  |
| C                                                 | -0.71607 | 2.740728 | -0.14391 |  | C                                                  | -0.7238  | 2.774509 | -0.17039 |
| C                                                 | -0.18809 | 1.481237 | -0.07958 |  | C                                                  | -0.17706 | 1.474576 | -0.08145 |
| C                                                 | -0.47835 | -0.9515  | -0.05394 |  | C                                                  | -0.46953 | -0.94121 | -0.08971 |

|   |          |          |          |  |   |          |          |          |
|---|----------|----------|----------|--|---|----------|----------|----------|
| C | -1.3058  | -2.03678 | -0.08078 |  | C | -1.30349 | -2.0953  | -0.17726 |
| C | -2.70298 | -1.88257 | -0.0875  |  | C | -2.65177 | -1.95346 | -0.17435 |
| C | -3.27836 | -0.63863 | -0.073   |  | C | -3.27603 | -0.66852 | -0.06122 |
| C | 1.280882 | 1.310519 | -0.0336  |  | C | 1.268786 | 1.31568  | -0.0288  |
| N | 1.769237 | 0.008764 | -0.00888 |  | N | 1.762747 | 0.013641 | -0.00917 |
| C | 0.98353  | -1.1407  | -0.02596 |  | C | 0.981412 | -1.12813 | -0.05354 |
| C | 3.199128 | -0.16326 | 0.029637 |  | C | 3.190891 | -0.15821 | 0.044424 |
| C | 3.909803 | -0.25213 | -1.15362 |  | C | 3.916659 | -0.23824 | -1.13061 |
| C | 5.285039 | -0.41769 | -1.11474 |  | C | 5.291198 | -0.40507 | -1.07686 |
| C | 5.942082 | -0.49334 | 0.103769 |  | C | 5.934169 | -0.49105 | 0.148552 |
| C | 5.222024 | -0.40306 | 1.285001 |  | C | 5.19977  | -0.40986 | 1.321576 |
| C | 3.846608 | -0.23746 | 1.249524 |  | C | 3.824904 | -0.24316 | 1.270946 |
| O | 1.498037 | -2.22538 | -0.01599 |  | O | 1.486388 | -2.22734 | -0.0567  |
| O | 2.037034 | 2.242204 | -0.01931 |  | O | 2.034354 | 2.253725 | -0.00284 |
| N | -4.67377 | -0.4421  | -0.05388 |  | N | -4.62153 | -0.57882 | 0.076557 |
| C | -5.2061  | -0.03841 | 1.245383 |  | C | -5.2505  | 0.287713 | 1.07113  |
| C | -5.48506 | -1.48162 | -0.6636  |  | C | -5.48873 | -1.6554  | -0.36978 |
| H | -4.00143 | 1.979243 | -0.27419 |  | H | -3.989   | 1.96555  | -0.40081 |
| H | -2.51306 | 3.912278 | -0.29361 |  | H | -2.50477 | 3.906481 | -0.36899 |
| H | -0.05883 | 3.589078 | -0.15457 |  | H | -0.06461 | 3.619791 | -0.1679  |
| H | -0.8821  | -3.02309 | -0.07789 |  | H | -0.84862 | -3.06395 | -0.22087 |
| H | -3.31461 | -2.76335 | -0.08285 |  | H | -3.26943 | -2.8293  | -0.18998 |
| H | 3.391446 | -0.19259 | -2.0936  |  | H | 3.409731 | -0.17046 | -2.07623 |
| H | 5.83986  | -0.48728 | -2.03307 |  | H | 5.8568   | -0.4675  | -1.98921 |
| H | 7.009342 | -0.62188 | 0.132605 |  | H | 7.000983 | -0.62048 | 0.188992 |
| H | 5.727709 | -0.46117 | 2.23206  |  | H | 5.694004 | -0.47591 | 2.274242 |
| H | 3.279551 | -0.16639 | 2.160116 |  | H | 3.247197 | -0.17907 | 2.175357 |
| H | -4.6073  | 0.749669 | 1.678442 |  | H | -4.51944 | 0.90713  | 1.561405 |
| H | -5.2316  | -0.87232 | 1.947233 |  | H | -5.73156 | -0.33458 | 1.821032 |
| H | -6.21545 | 0.332784 | 1.115152 |  | H | -6.00543 | 0.915213 | 0.611483 |
| H | -5.08347 | -1.74577 | -1.63316 |  | H | -5.12821 | -2.07307 | -1.29844 |
| H | -6.48728 | -1.09474 | -0.80417 |  | H | -6.47565 | -1.24463 | -0.54124 |
| H | -5.55895 | -2.38408 | -0.05693 |  | H | -5.57638 | -2.44614 | 0.37282  |
